# Supplementary material
Source: PubMed Central journal article supplement (PMC4391991)

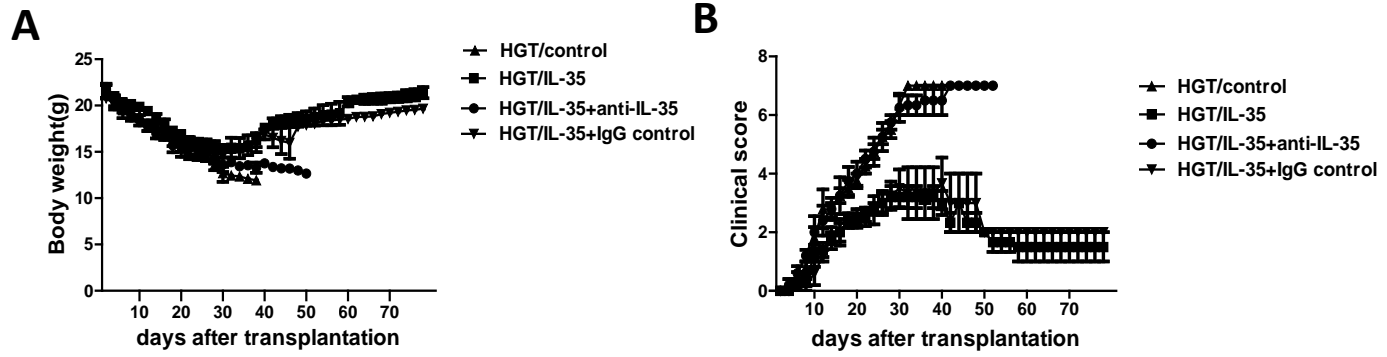

**Fig. S1**

Supplement: NIHMS636248-supplement-3.pdf [file NIHMS636248-supplement-3.pdf]

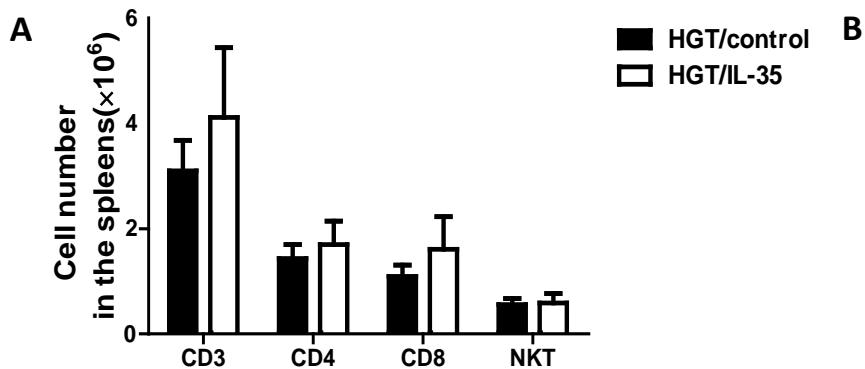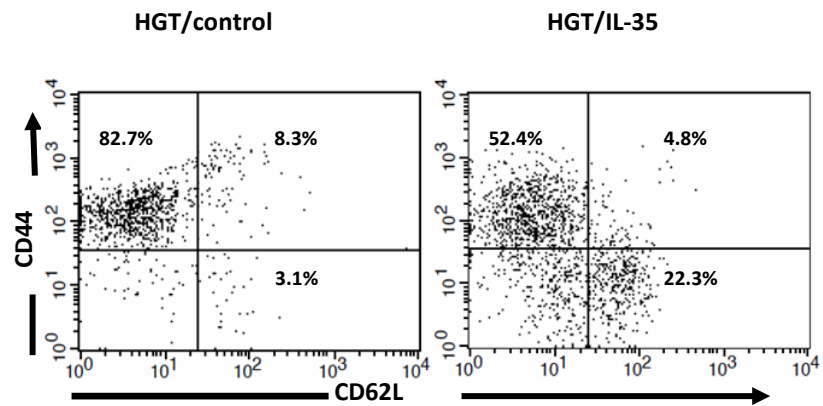

**Fig. S2**

Supplement: NIHMS636248-supplement-4.pdf [file NIHMS636248-supplement-4.pdf]

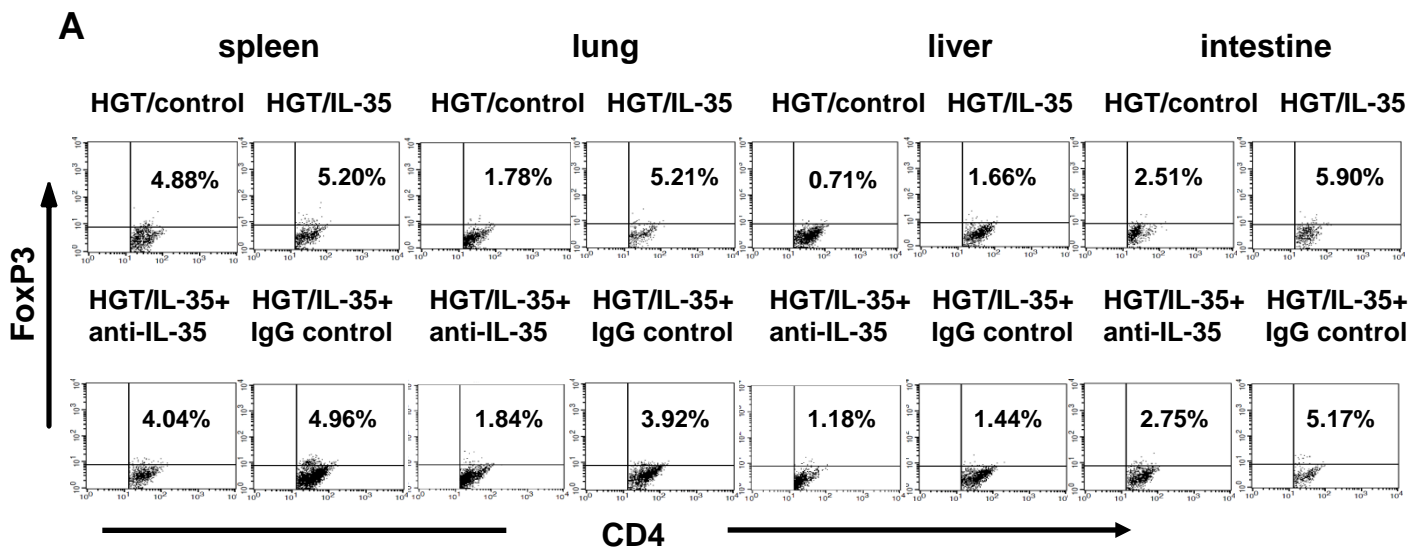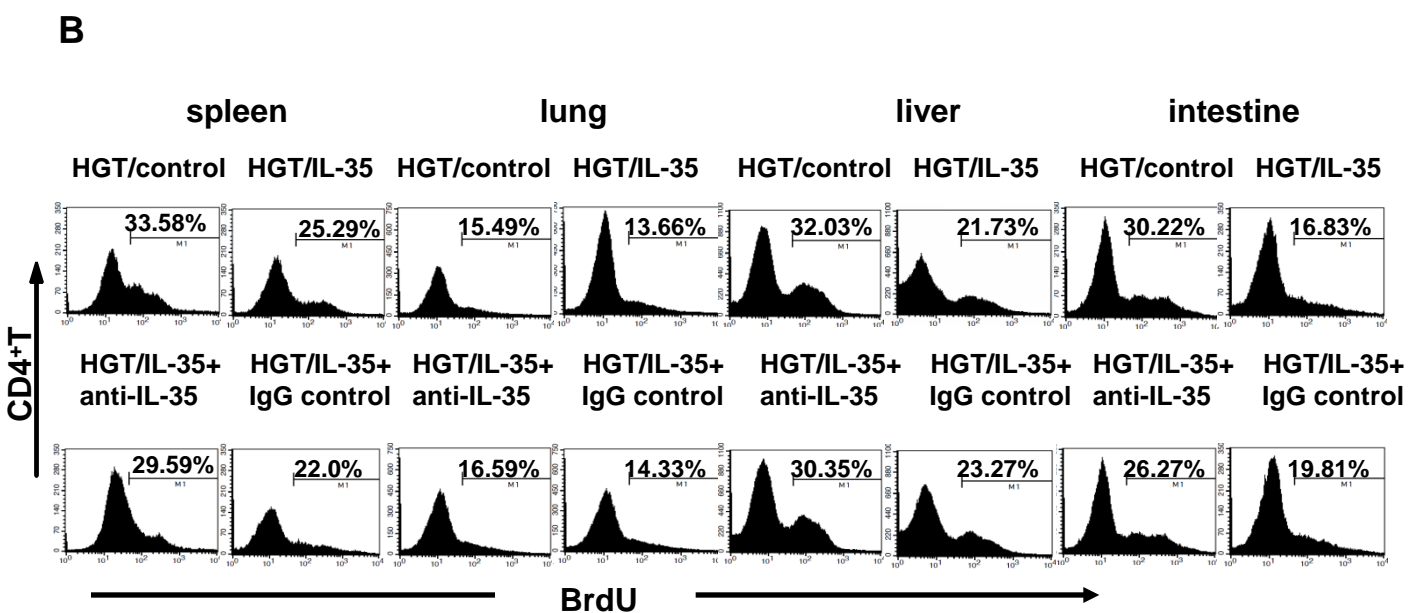

**Fig. S3**

Supplement: NIHMS636248-supplement-5.pdf [file NIHMS636248-supplement-5.pdf]

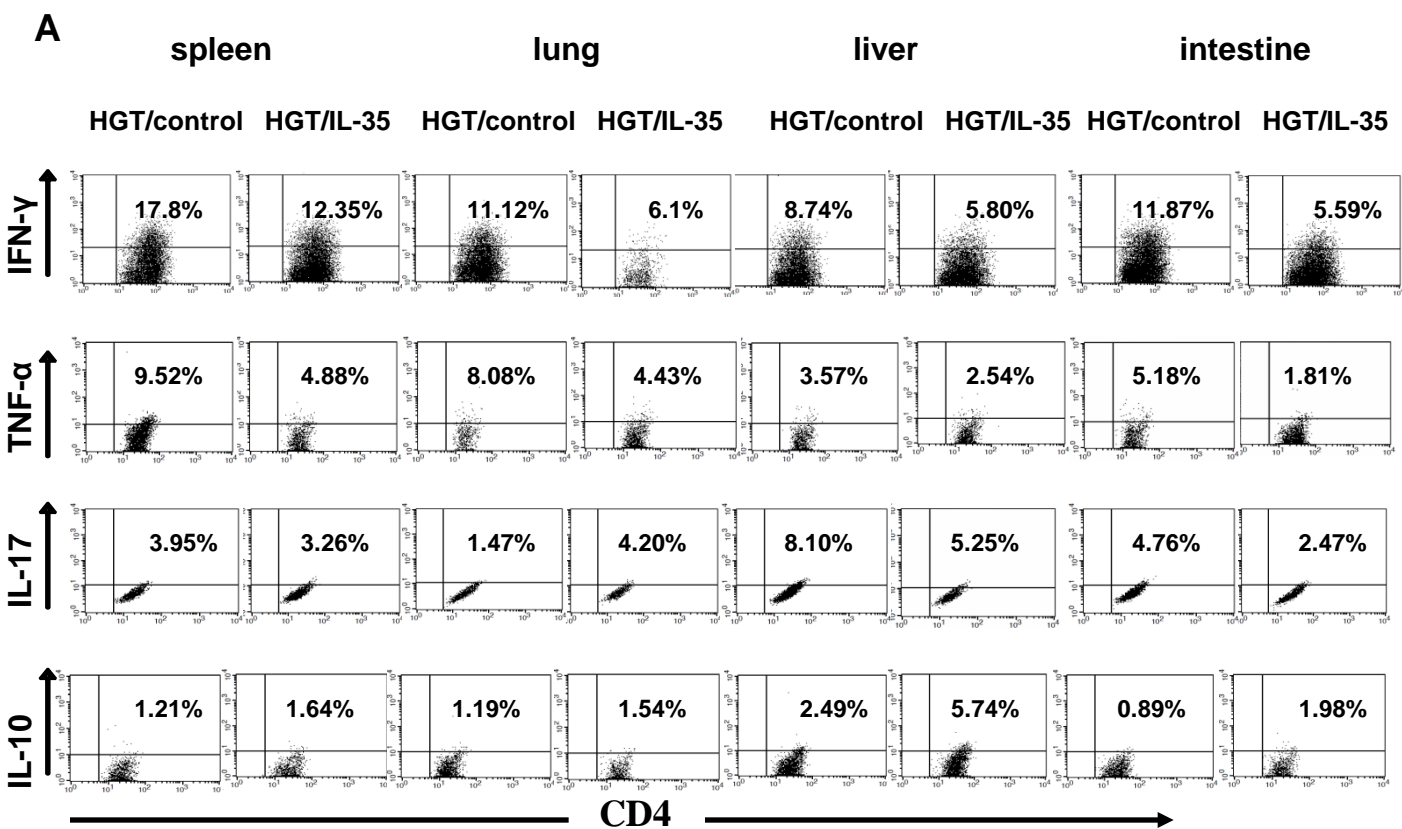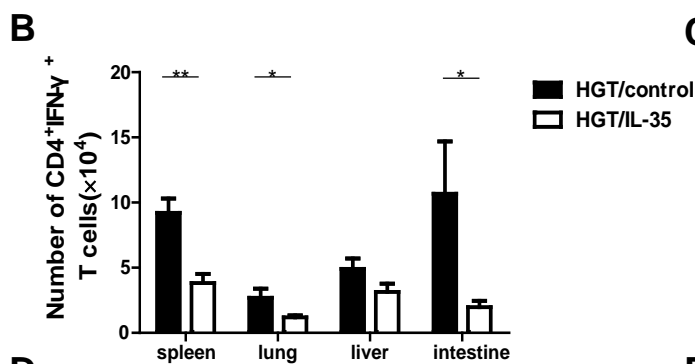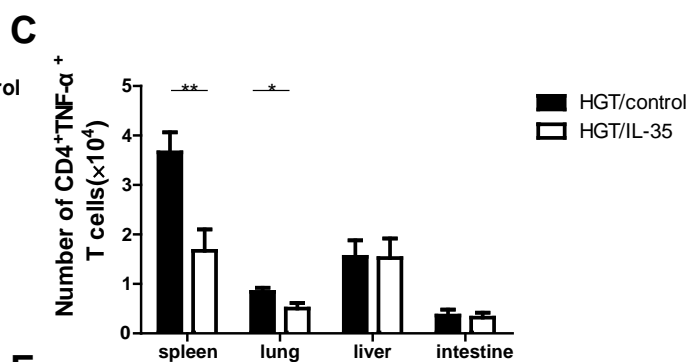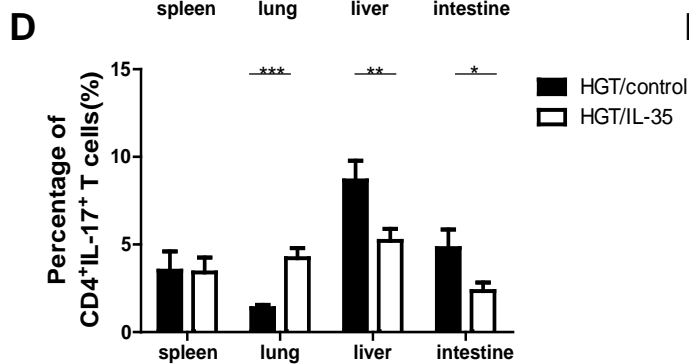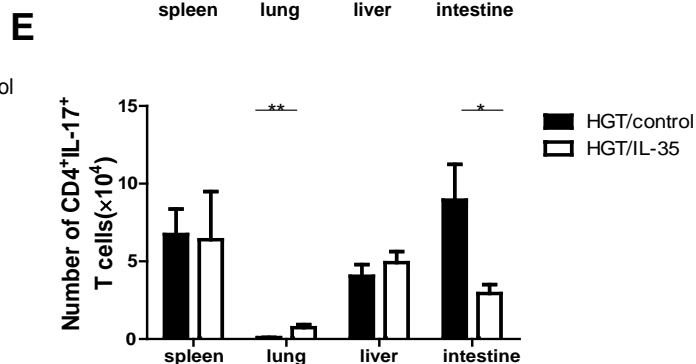

**Fig. S4**

Supplement: NIHMS636248-supplement-6.pdf [file NIHMS636248-supplement-6.pdf]

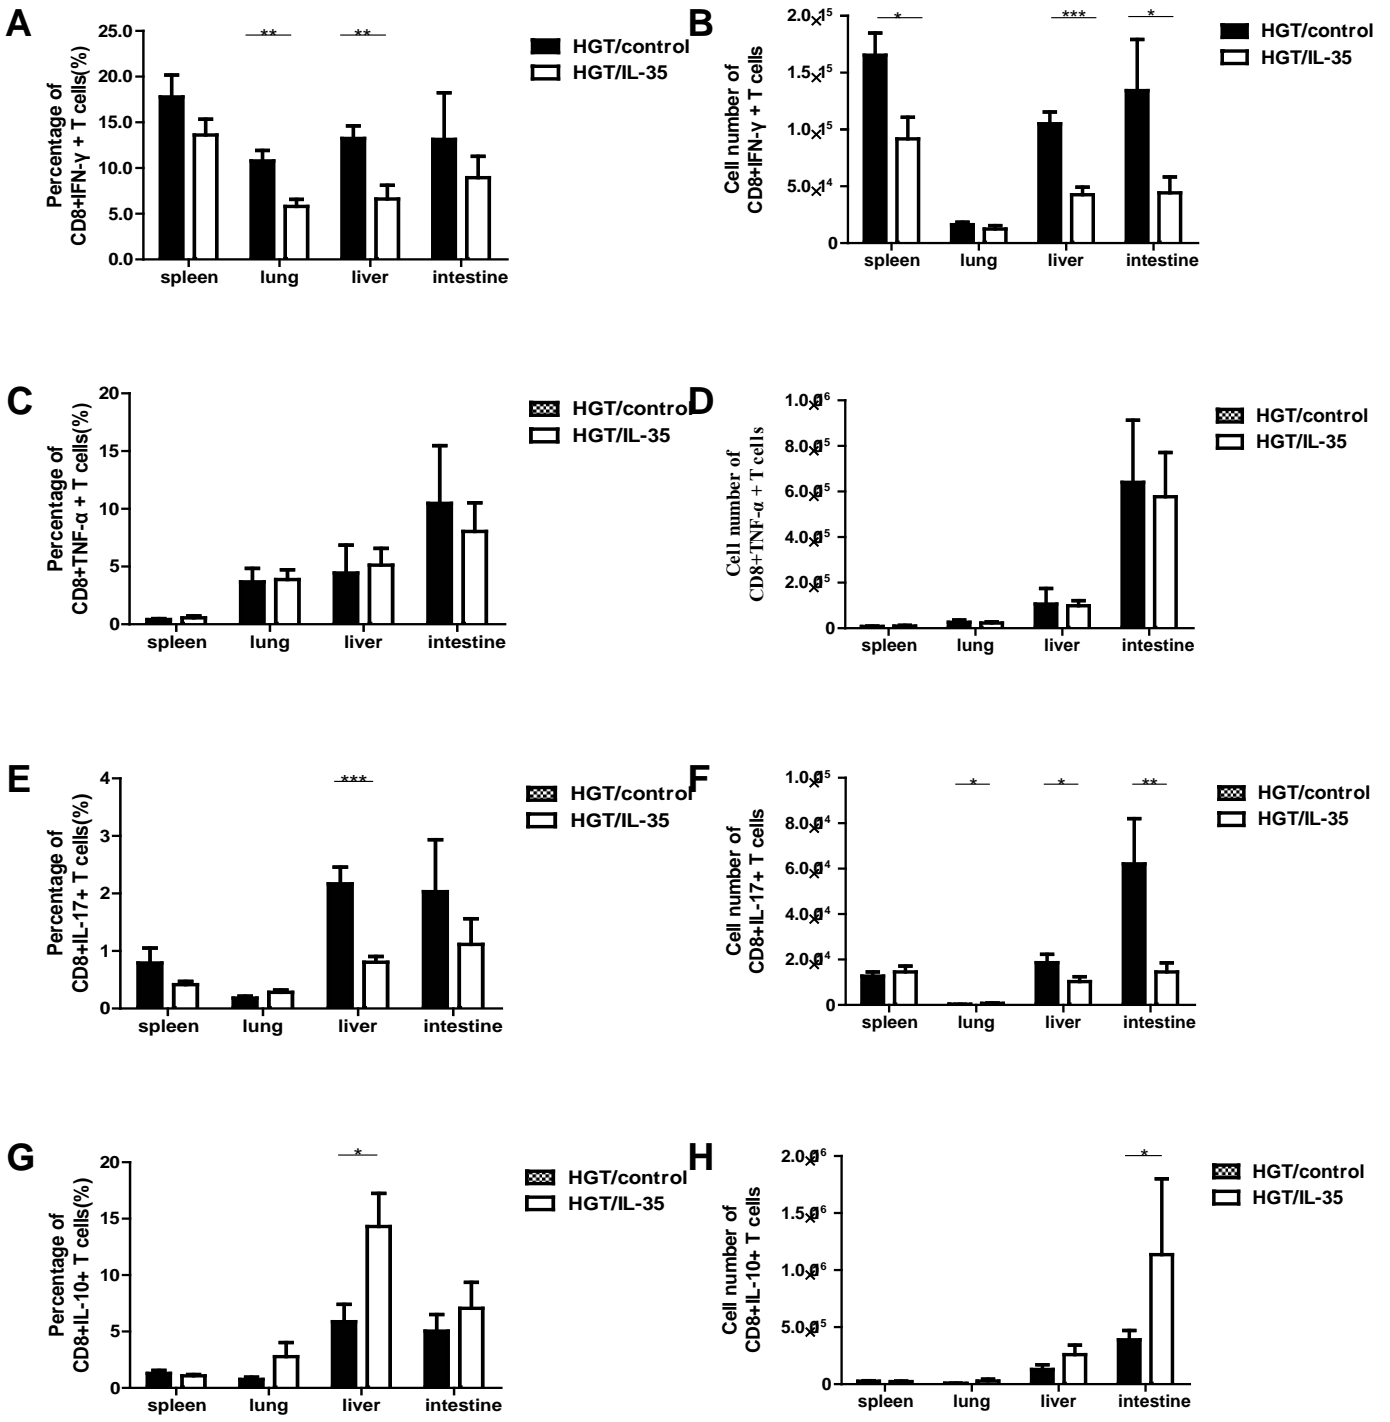

**Fig. S5**

Supplement: NIHMS636248-supplement-7.pdf [file NIHMS636248-supplement-7.pdf]
